# Supplementary material for: Synthesis and Anti-Inflammatory Activity of Ferulic Acid-Sesquiterpene Lactone Hybrids
Source: MDPI journal article supplement (doi:10.3390/molecules29050936), 2024-02-21
Supplement: s1 [file s1]

## *Supporting Information*

# Synthesis and Anti-Inflammatory Activity of Ferulic Acid-Sesquiterpene Lactone Hybrids

Xiyan Duan <sup>1,\*</sup>, Ning Liu <sup>2</sup>, Ke Lv <sup>3,\*</sup>, Junqi Wang <sup>1</sup>, Mingyue Li <sup>4</sup>, Yanwei Zhang <sup>5</sup>, Xiaoguang Huo <sup>5</sup>, Shiqi Bao <sup>5</sup>, Zhuo Shen <sup>5</sup> and Xuemei Zhang <sup>5</sup>

<sup>1</sup> School of Chemistry & Chemical Engineering, Henan University of Science and Technology, Luoyang 471003, China; 17513624203@163.com

<sup>2</sup> School of Nursing, Henan University of Science and Technology, Luoyang 471003, China; 9943548@haust.edu.cn

<sup>3</sup> The State Key Laboratory of Medicinal Chemical Biology & College of Chemistry, Nankai University, Tianjin 300071, China

<sup>4</sup> College of Pharmacy, Nankai University, Tianjin 300071, China; lmy1137534123@163.com

<sup>5</sup> Accendatech Company, Ltd., Tianjin 300384, China; zyw12130123@163.com (Y.Z.); huoxg0323@163.com (X.H.); shiqi.bao@accendatech.com (S.B.); shenzhuo@accendatech.com (Z.S.); xuemei.zhang@accendatech.com (X.Z.)

\* Correspondence: duanxiyan@tju.edu.cn (X.D.); lk2387723328@gmail.com (K.L.)

## Table of Contents

|                                                            |    |
|------------------------------------------------------------|----|
| Figure S1 <sup>1</sup> H NMR spectra of compound 7 .....   | 3  |
| Figure S2 <sup>1</sup> H NMR spectra of compound 9 .....   | 4  |
| Figure S3 <sup>13</sup> C NMR spectra of compound 9.....   | 4  |
| Figure S4 <sup>1</sup> H NMR spectra of compound 1 .....   | 5  |
| Figure S5 <sup>13</sup> C NMR spectra of compound 1.....   | 5  |
| Figure S6 <sup>1</sup> H NMR spectra of compound 10 .....  | 6  |
| Figure S7 <sup>13</sup> C NMR spectra of compound 10.....  | 6  |
| Figure S8 <sup>1</sup> H NMR spectra of compound 2 .....   | 7  |
| Figure S9 <sup>13</sup> C NMR spectra of compound 2.....   | 7  |
| Figure S10 <sup>1</sup> H NMR spectra of compound 5 .....  | 8  |
| Figure S11 <sup>13</sup> C NMR spectra of compound 5.....  | 8  |
| Figure S12 <sup>1</sup> H NMR spectra of compound 3 .....  | 9  |
| Figure S13 <sup>1</sup> H NMR spectra of compound 12 ..... | 9  |
| Figure S14 <sup>13</sup> C NMR spectra of compound 12..... | 10 |
| Figure S15 <sup>1</sup> H NMR spectra of compound 6 .....  | 10 |
| Figure S16 <sup>13</sup> C NMR spectra of compound 6.....  | 11 |
| Figure S17 <sup>1</sup> H NMR spectra of compound 13 ..... | 11 |
| Figure S18 <sup>13</sup> C NMR spectra of compound 13..... | 12 |
| Figure S19 <sup>1</sup> H NMR spectra of compound 14 ..... | 12 |
| Figure S20 <sup>13</sup> C NMR spectra of compound 14..... | 13 |
| Figure S21 <sup>1</sup> H NMR spectra of compound 15 ..... | 13 |
| Figure S22 <sup>13</sup> C NMR spectra of compound 15..... | 14 |
| Figure S23 <sup>1</sup> H NMR spectra of compound 16 ..... | 14 |
| Figure S24 <sup>13</sup> C NMR spectra of compound 16..... | 15 |
| Figure S25 <sup>1</sup> H NMR spectra of compound 4 .....  | 15 |
| Figure S26 <sup>13</sup> C NMR spectra of compound 4.....  | 15 |
| Table S1 Primers for qRT-PCR.....                          | 16 |

2021. 05. 10MZ-2-90-b氢谱  
MZ-2-90-b 1H CDCL3

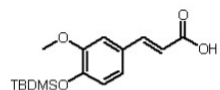

Chemical Formula:  $C_{16}H_{24}O_4Si$   
Exact Mass: 308.1444

Chemical structure of compound 10 is shown in the top left. The  $^1\text{H}$  NMR spectrum (CDCl<sub>3</sub>) is displayed below, with chemical shifts (ppm) and integration values indicated.

| Chemical Shift (ppm) | Integration |
|----------------------|-------------|
| 9.88                 | 1.00        |
| 7.4-7.5              | 1.93        |
| 6.5-6.6              | 1.09        |
| 5.5                  | 2.00        |
| 5.5                  | 0.97        |
| 3.5                  | 4.05        |
| 3.5                  | 1.01        |
| 3.5                  | 1.06        |
| 3.5                  | 1.02        |
| 2.5-2.6              | 1.08        |
| 2.5-2.6              | 2.94        |
| 2.5-2.6              | 1.06        |
| 2.5-2.6              | 1.14        |
| 1.5-1.6              | 2.99        |
| 1.5-1.6              | 1.30        |
| 1.5-1.6              | 2.98        |
| 1.5-1.6              | 9.29        |
| 0.7-0.8              | 6.38        |
| 0.16                 |             |

Figure S2 <sup>1</sup>H NMR spectra of compound 9

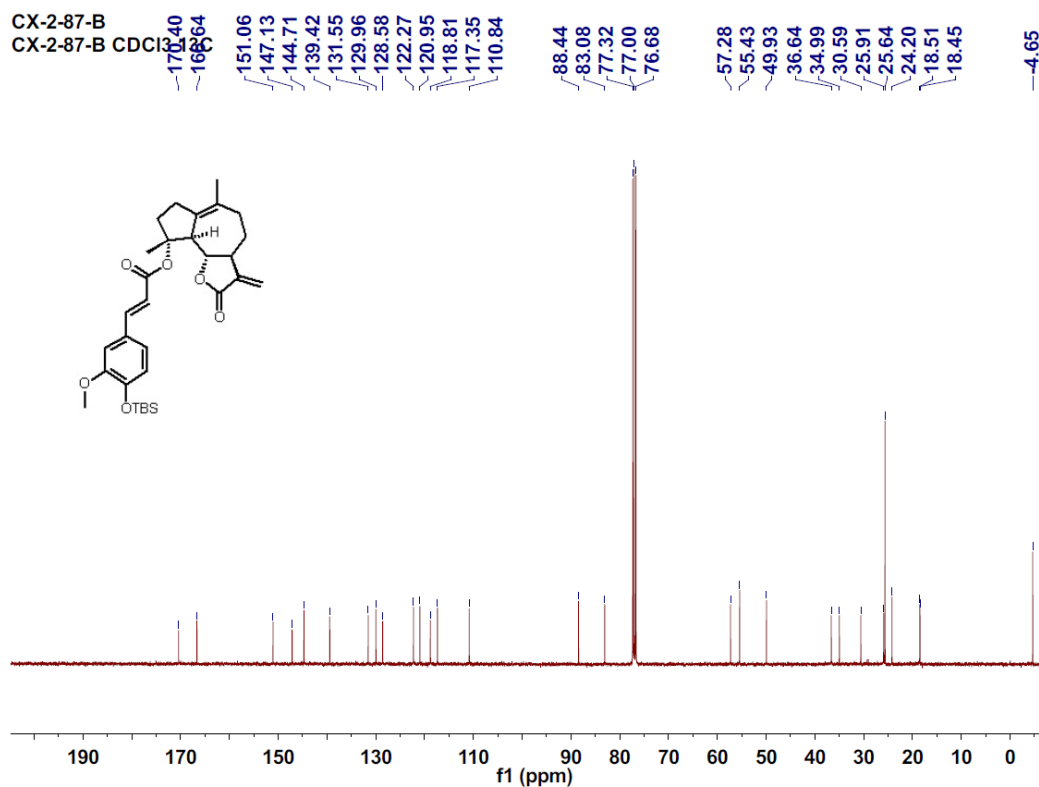

Figure S3 <sup>13</sup>C NMR spectra of compound 9

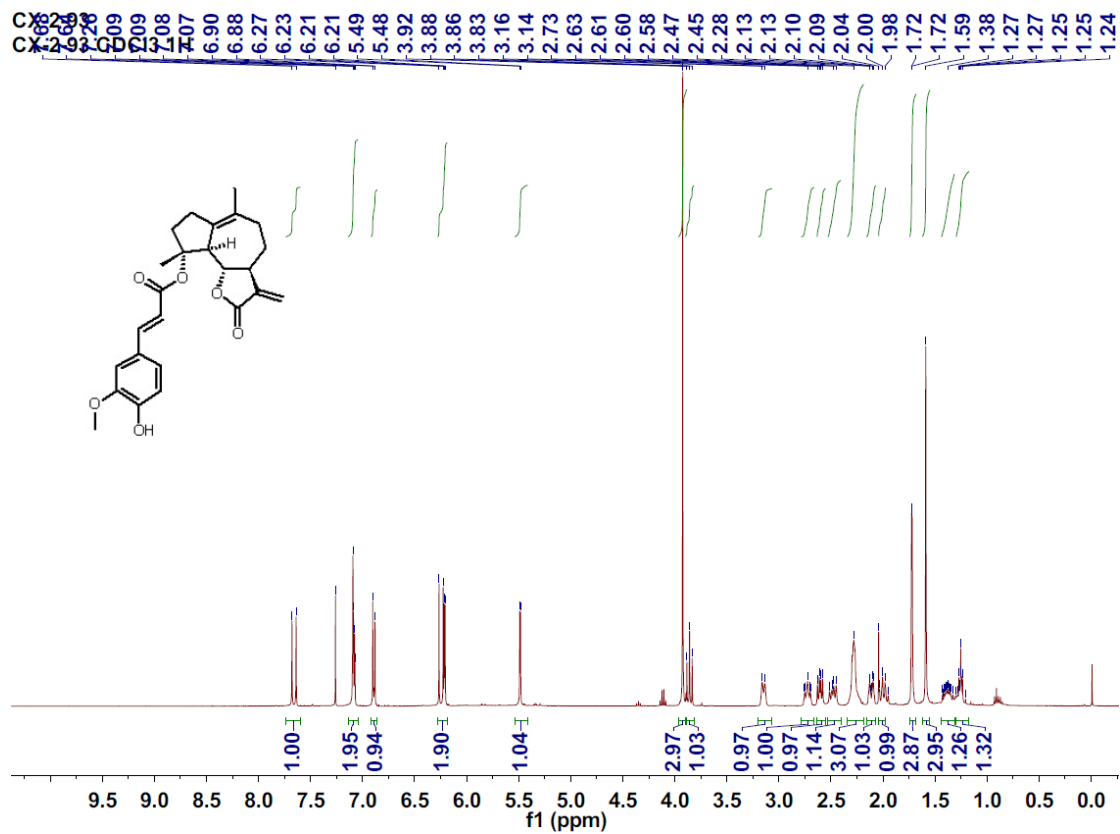

Figure S4 <sup>1</sup>H NMR spectra of compound 1

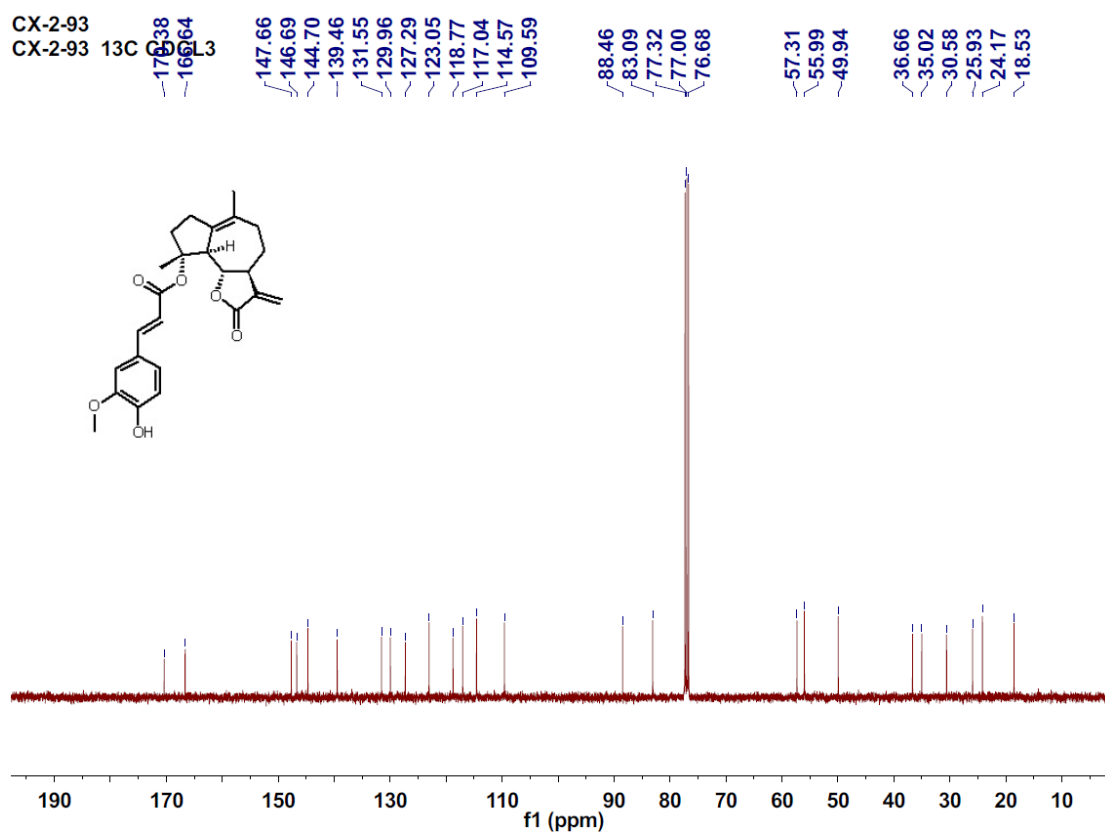

Figure S5 <sup>13</sup>C NMR spectra of compound 1

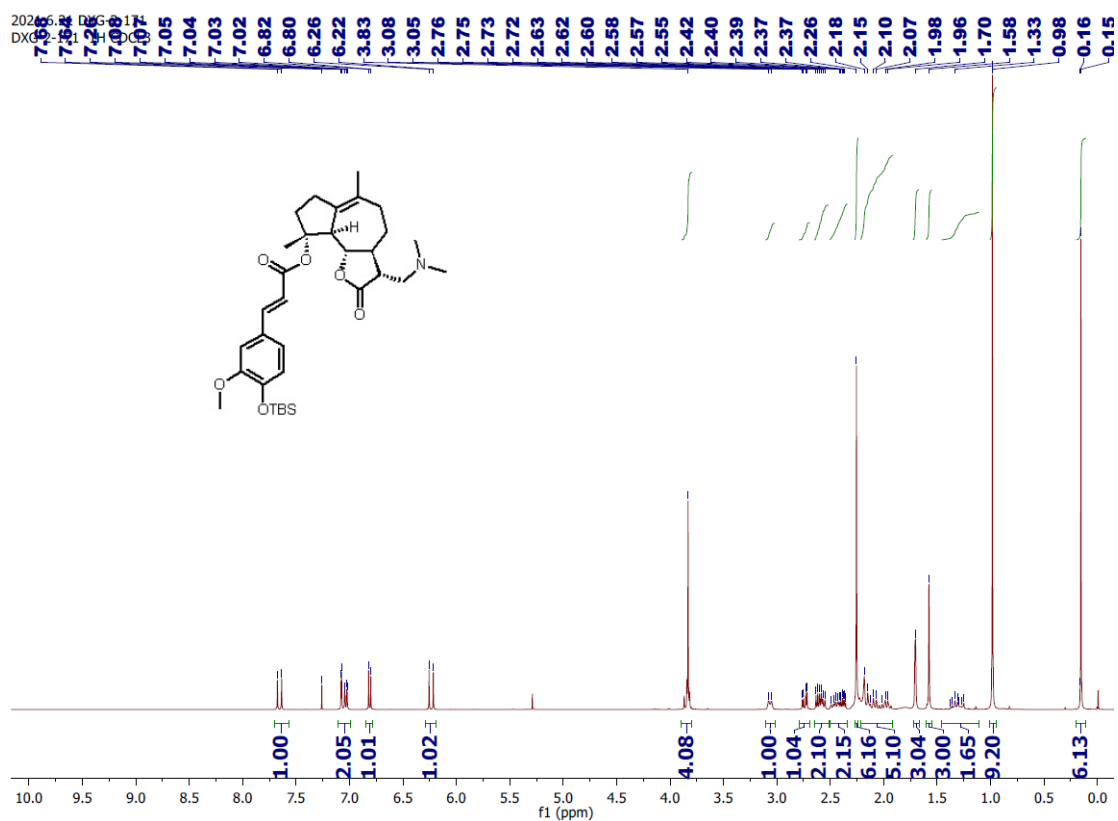

Figure S6 1H NMR spectra of compound 10

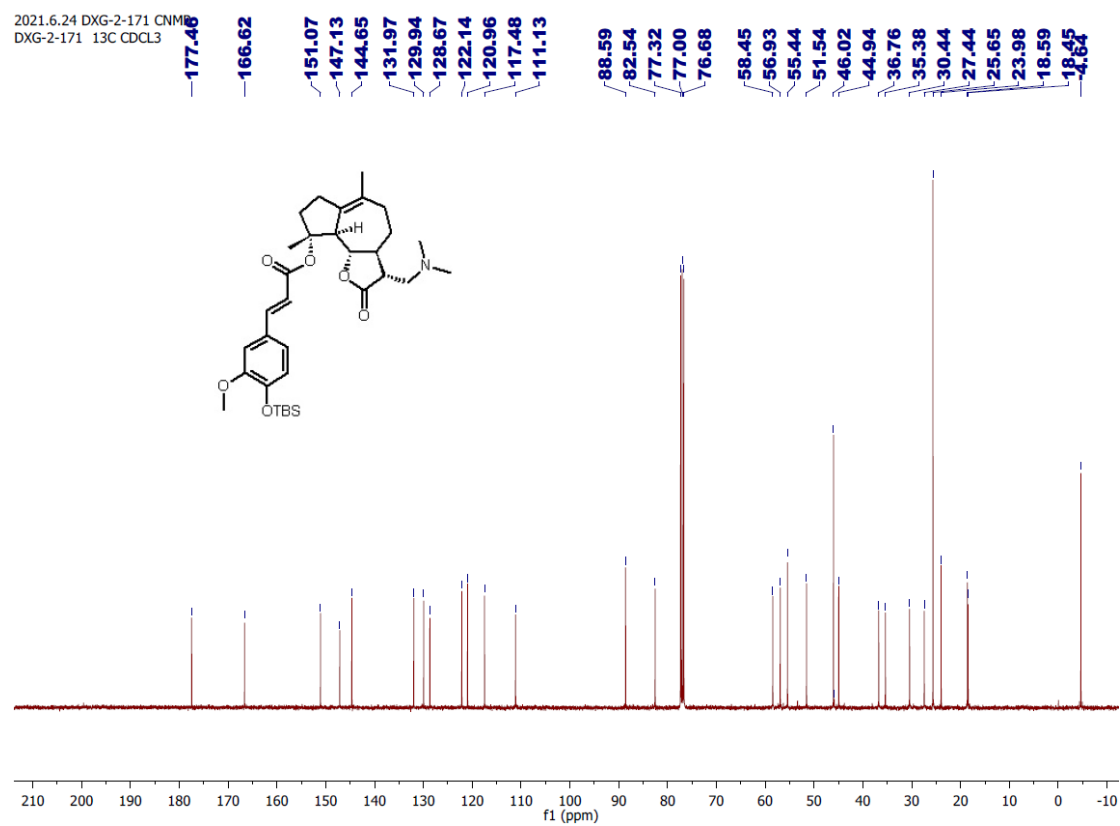

Figure S7 13C NMR spectra of compound 10

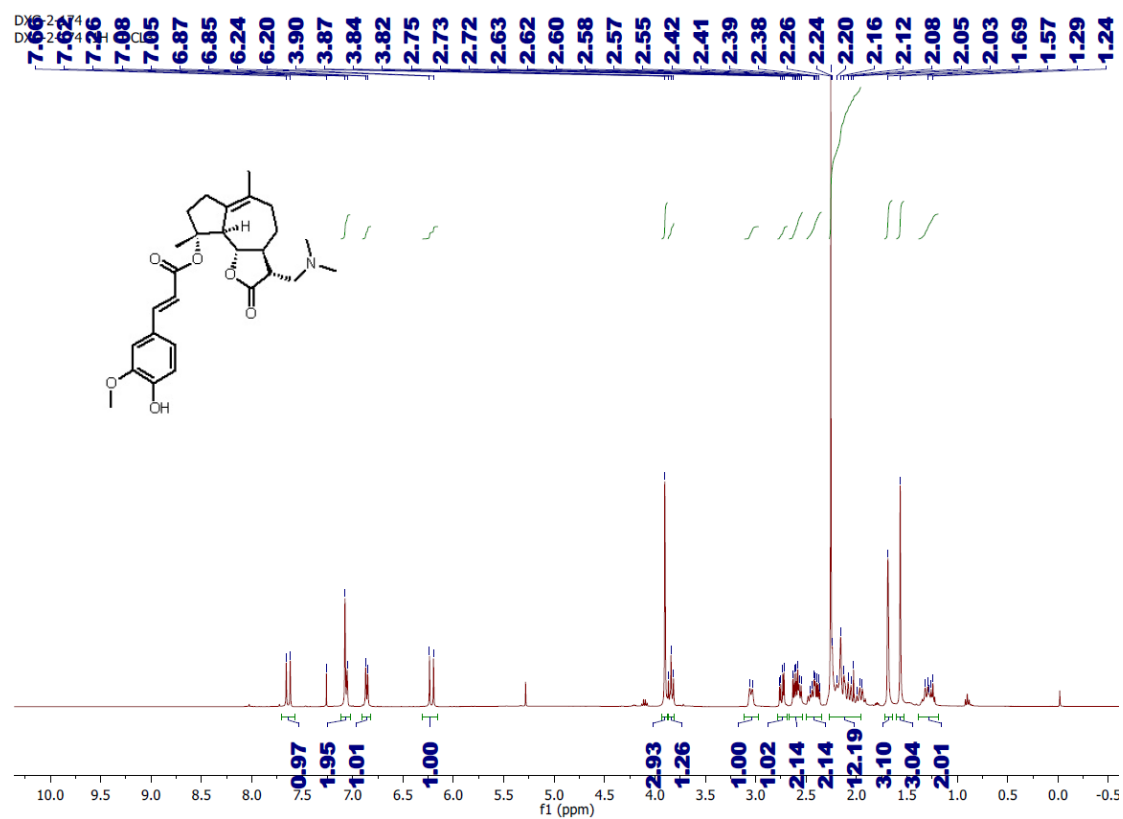

Figure S8 1H NMR spectra of compound 2

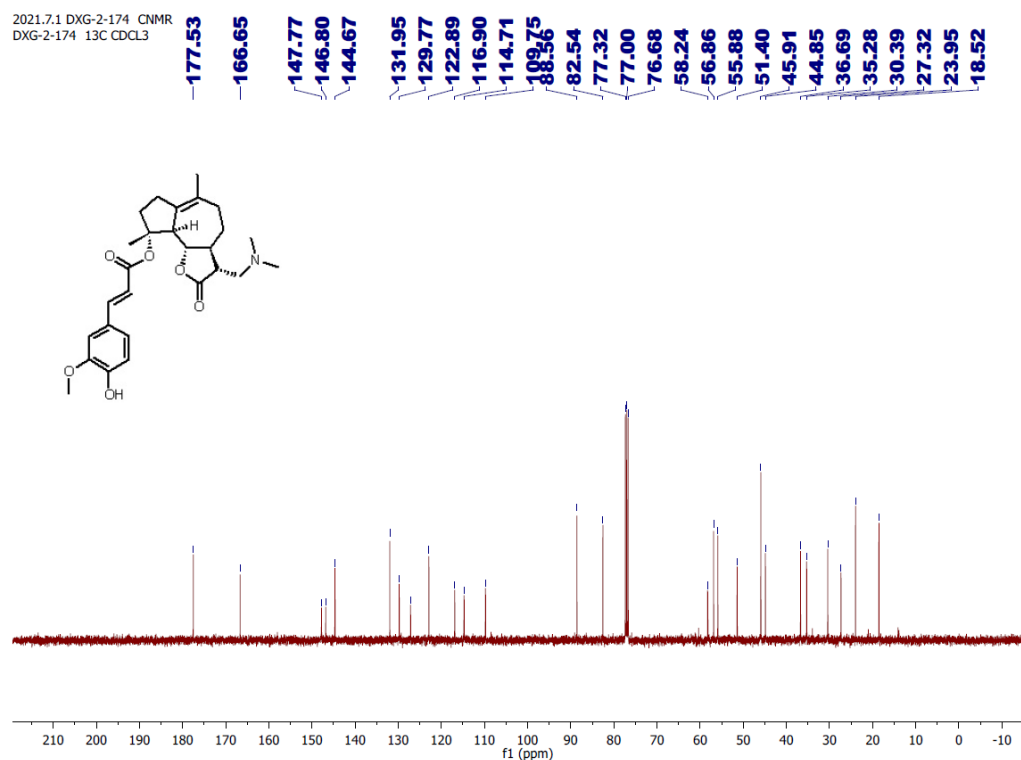

Figure S9 13C NMR spectra of compound 2

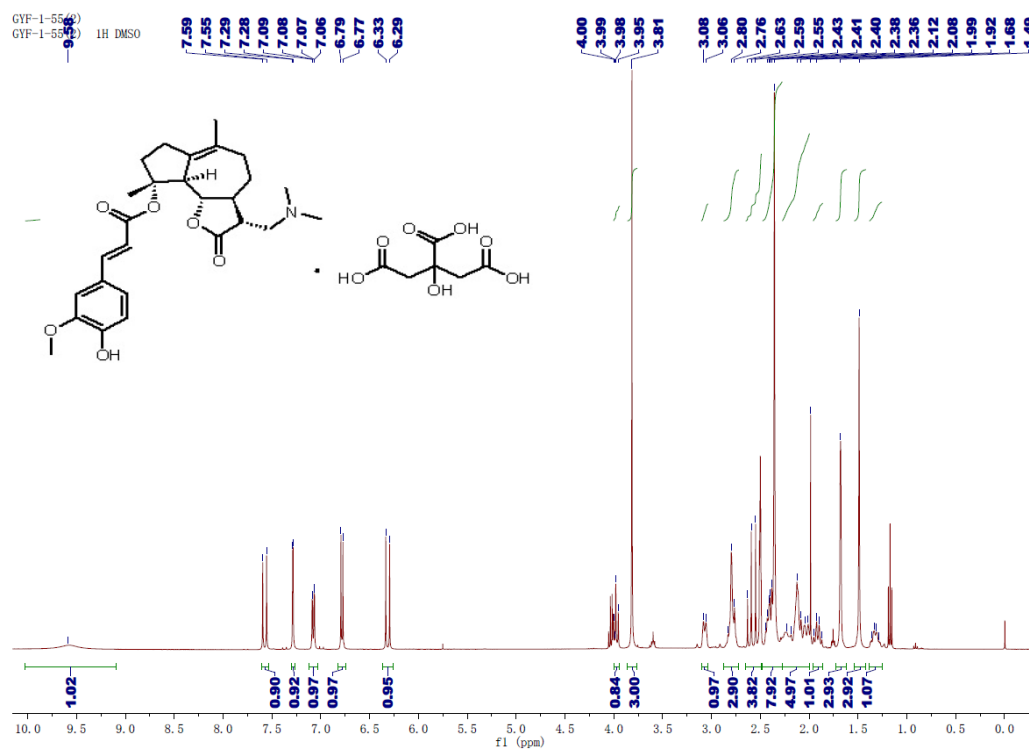

Figure S10 <sup>1</sup>H NMR spectra of compound 5

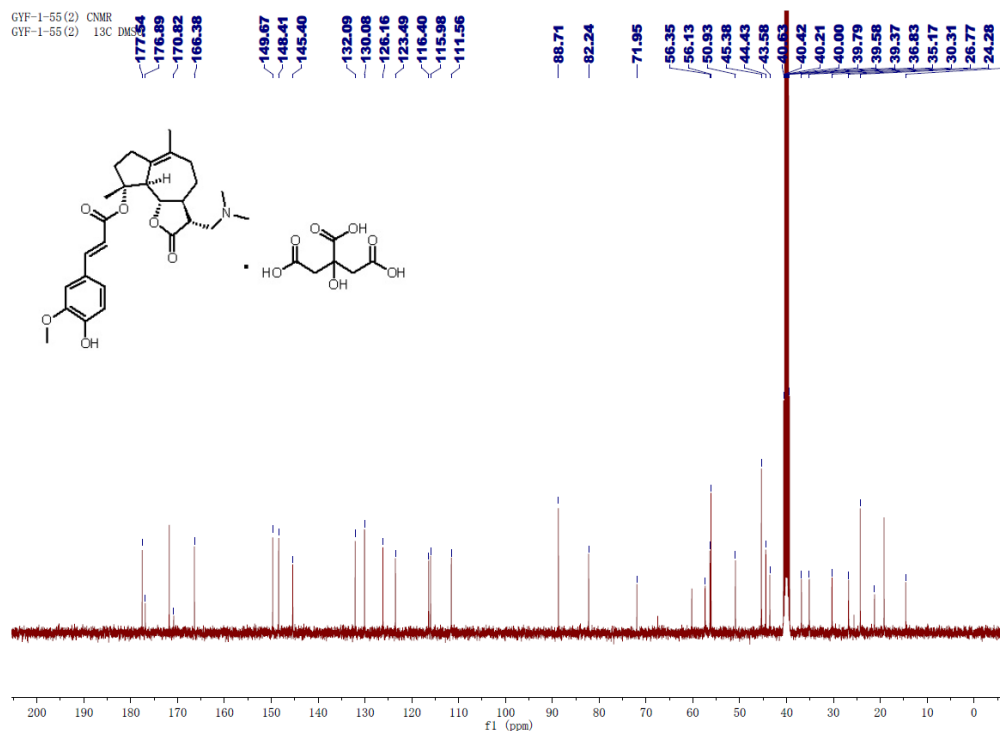

Figure S11 <sup>13</sup>C NMR spectra of compound 5

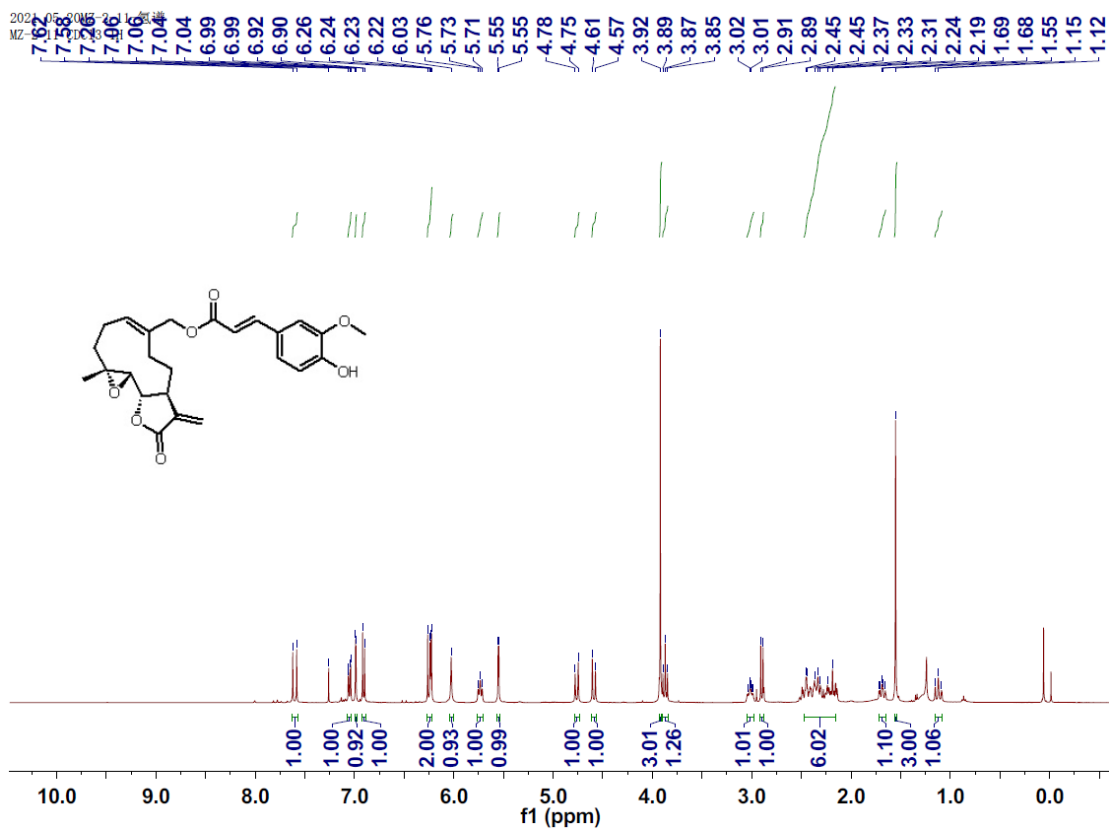



Figure S12 <sup>1</sup>H NMR spectra of compound 3

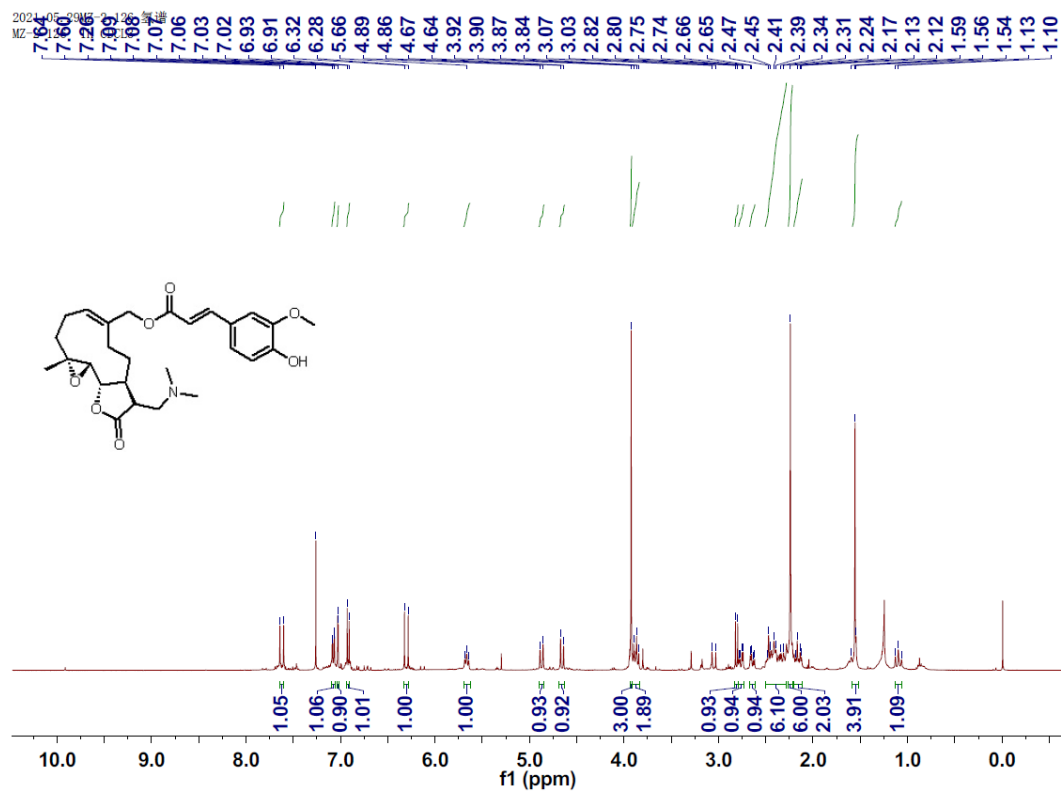

Figure S13 <sup>1</sup>H NMR spectra of compound 12

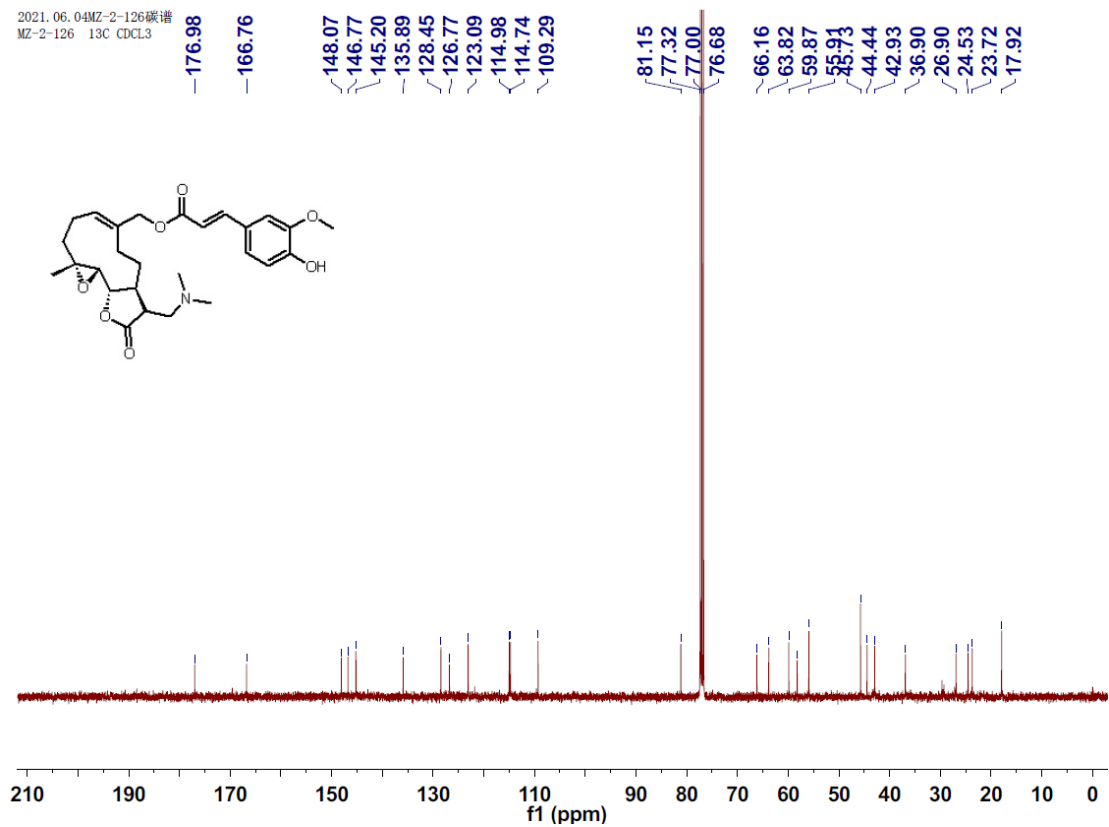

Figure S14 <sup>13</sup>C NMR spectra of compound 12

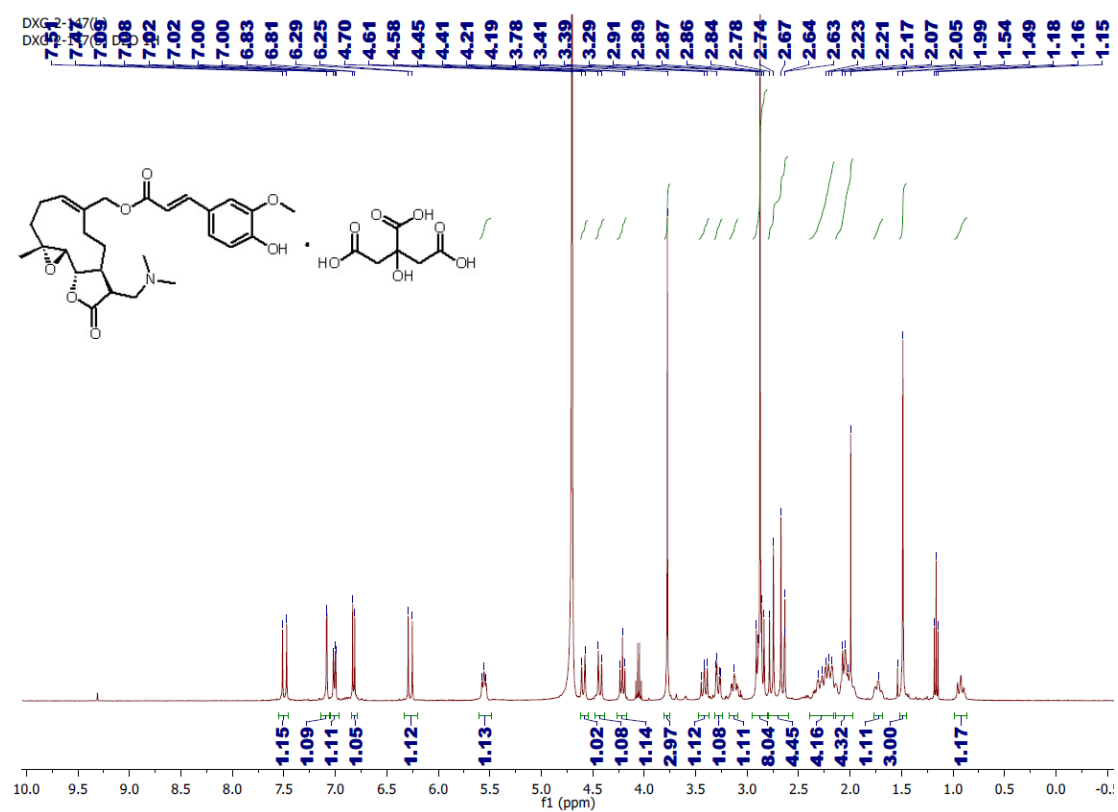

Figure S15 <sup>1</sup>H NMR spectra of compound 6

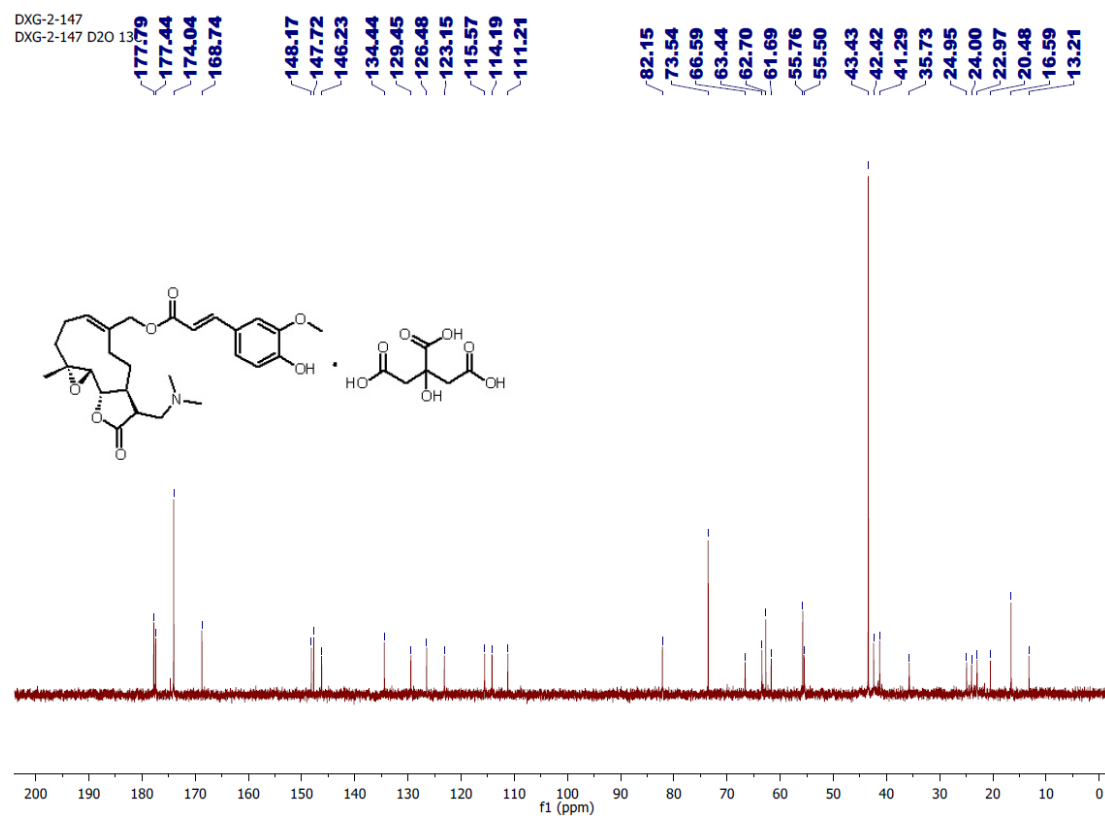

Figure S16 <sup>13</sup>C NMR spectra of compound 6

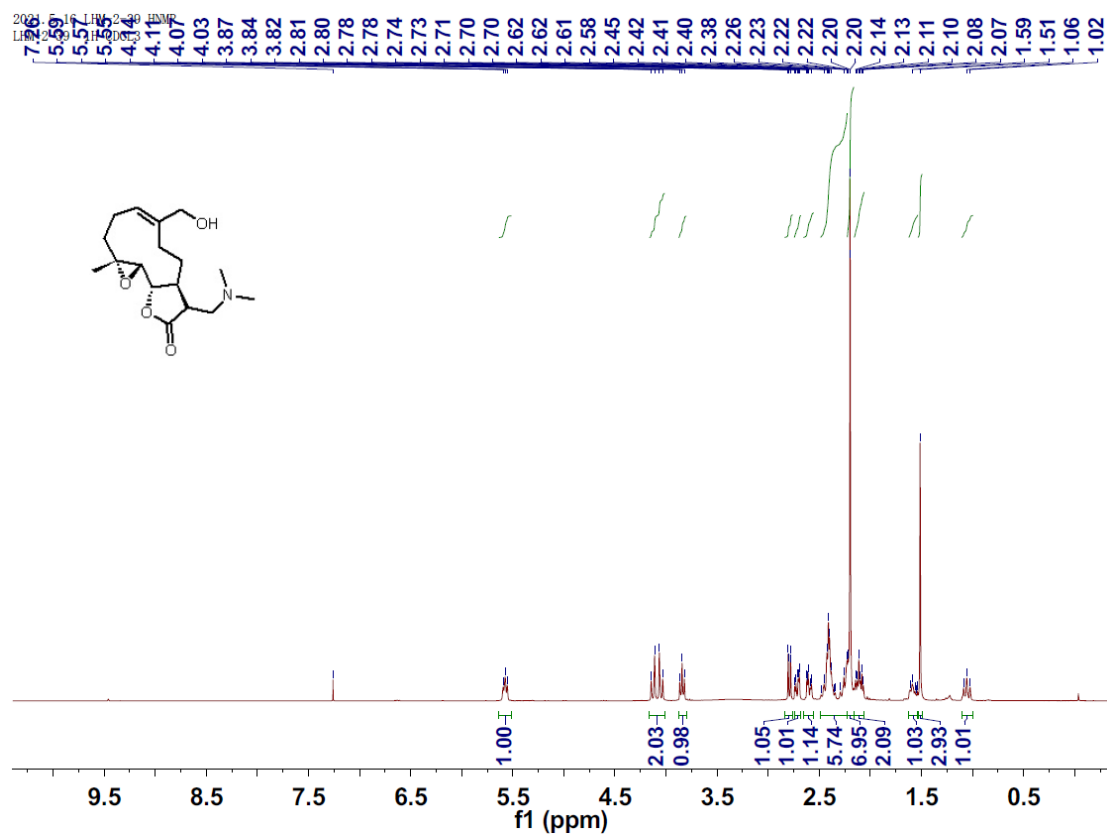

Figure S17 <sup>1</sup>H NMR spectra of compound 13

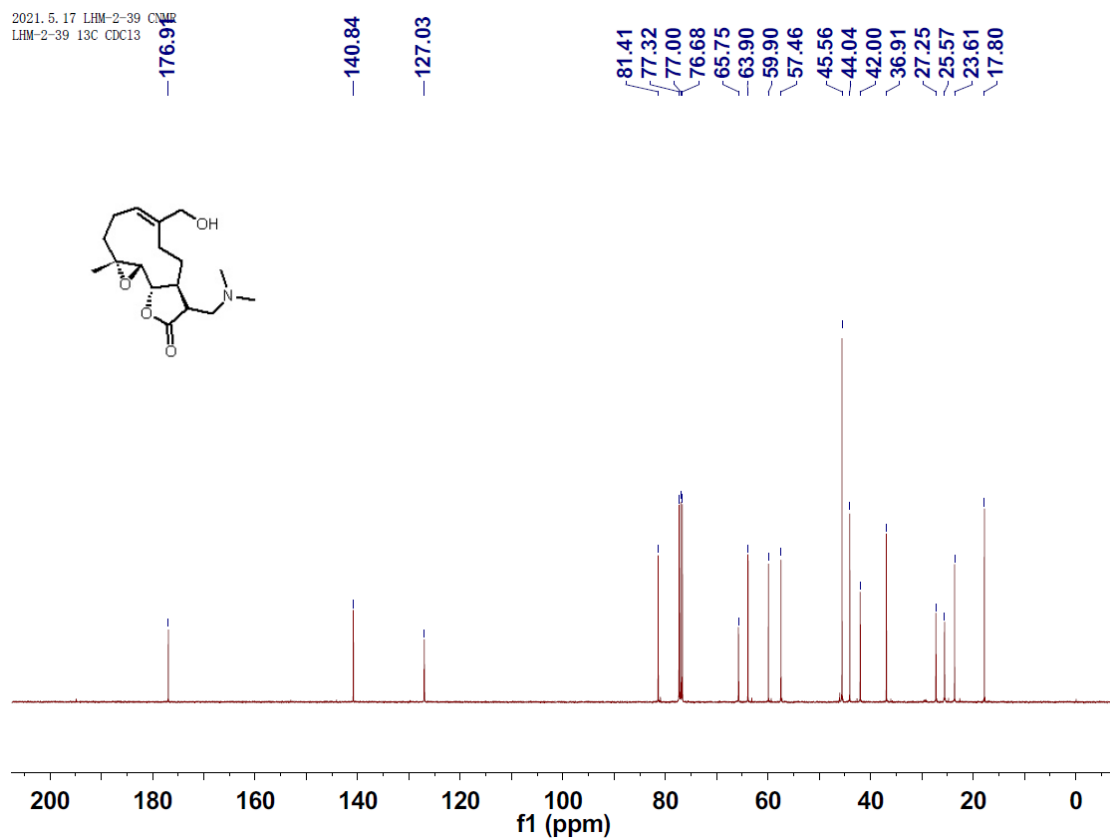

Figure S18 13C NMR spectra of compound 13

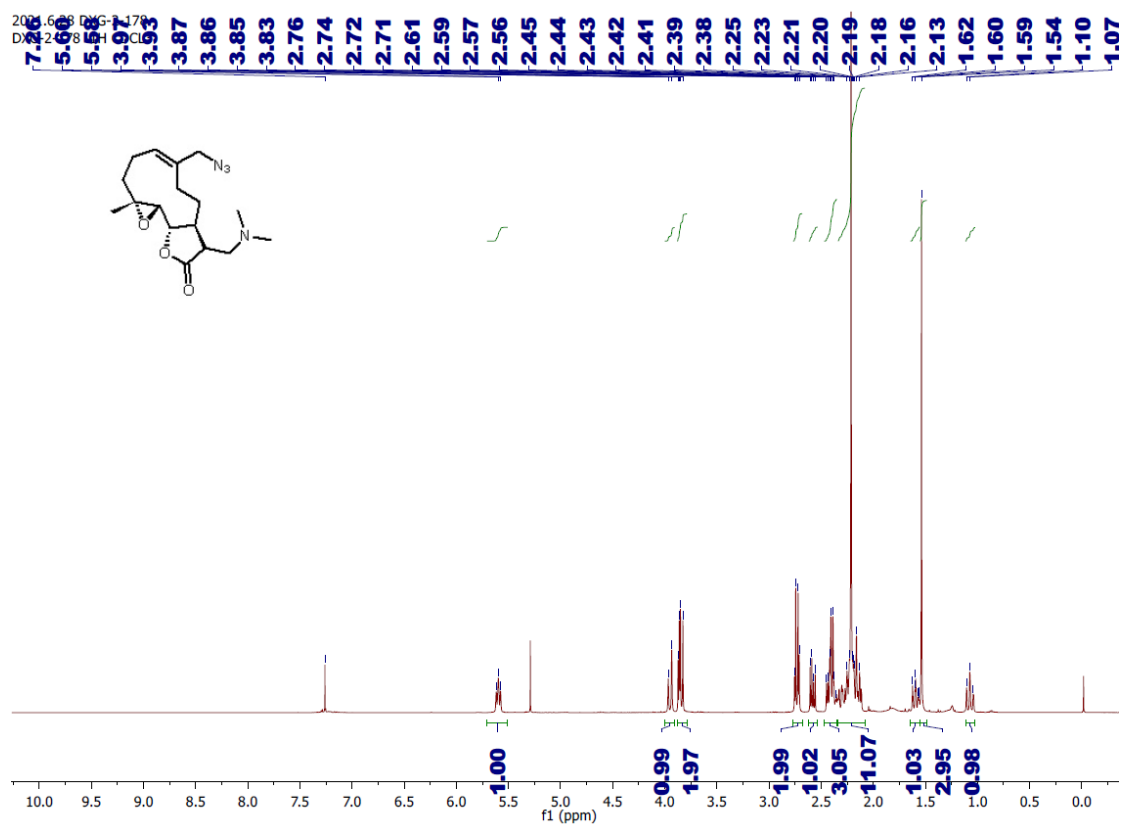

Figure S19 1H NMR spectra of compound 14

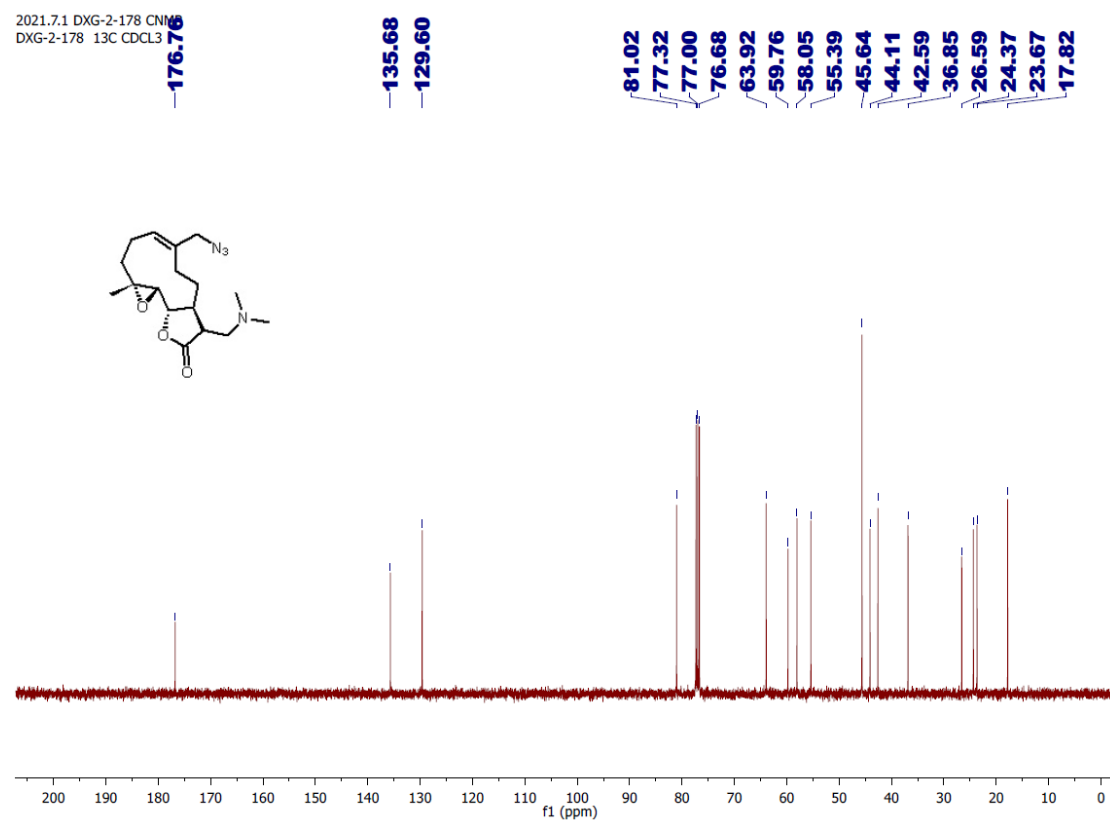

Figure S20 13C NMR spectra of compound 14

2021.7.1 DXG-2-182  
DXG-2-182 1H CDCL<sub>3</sub>

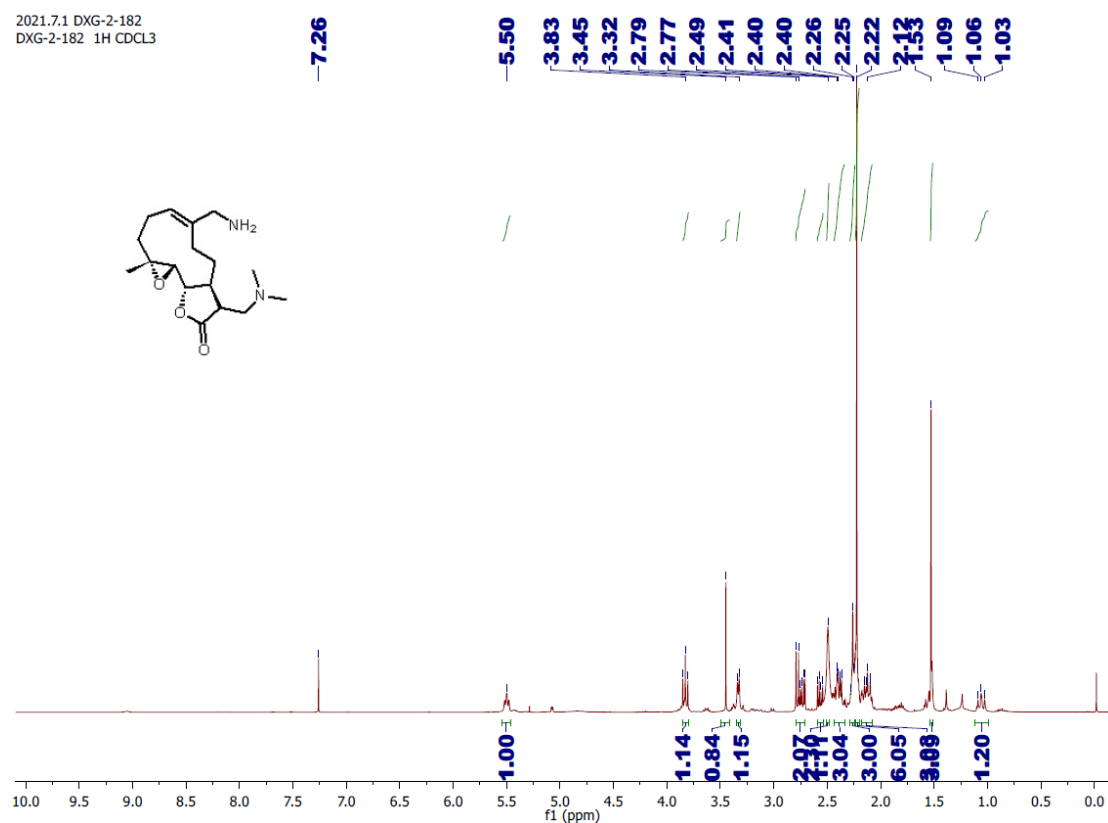

Figure S21 1H NMR spectra of compound 15

DXG-2-182  
DXG-2-182 13C CDCL<sub>3</sub>

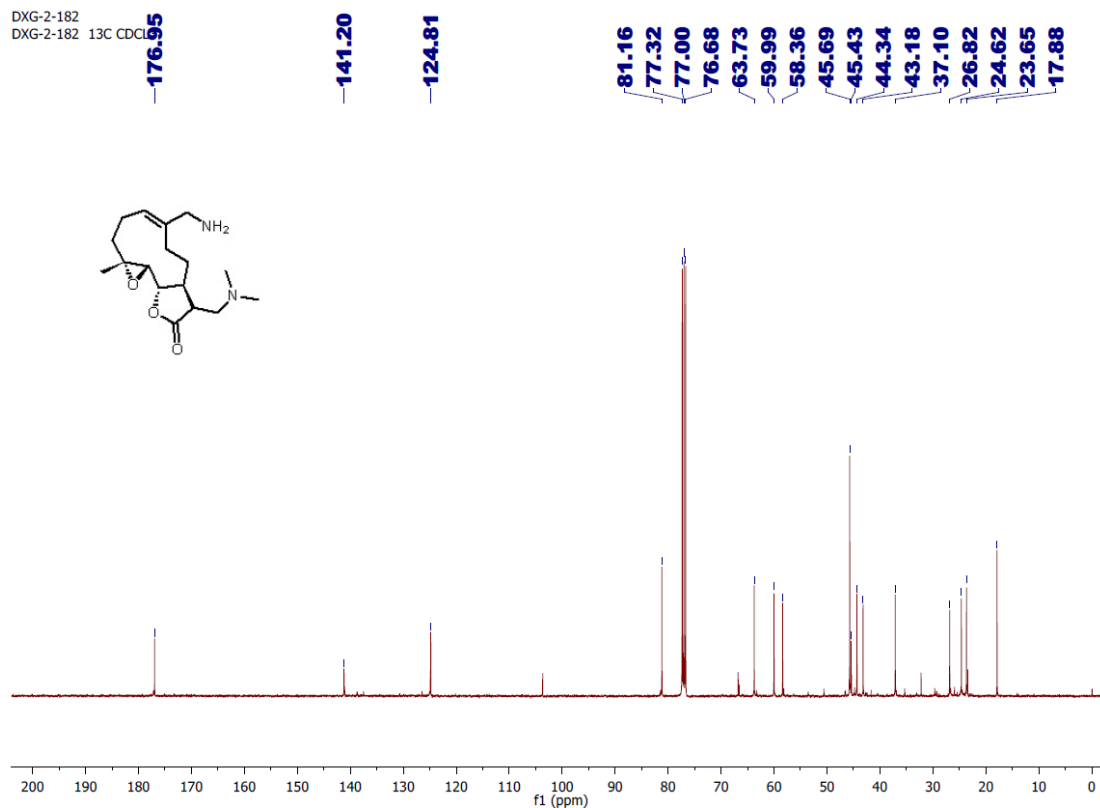

Figure S22 <sup>13</sup>C NMR spectra of compound 15

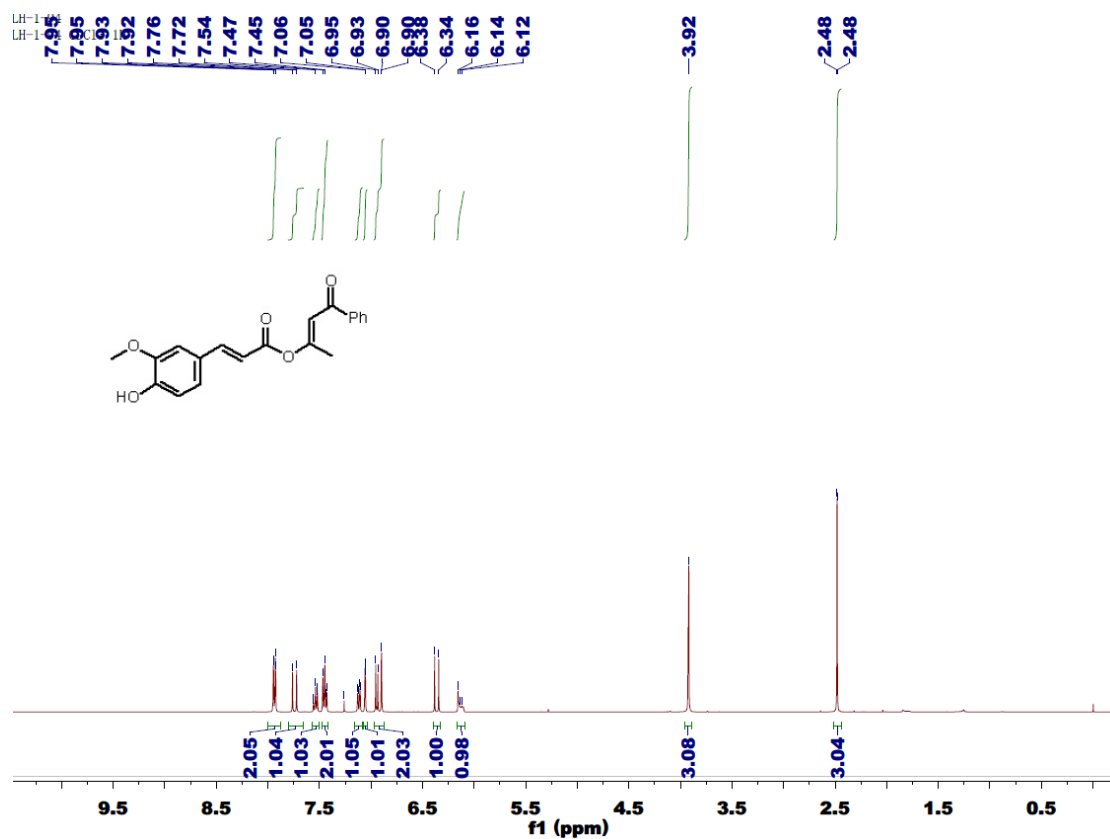

Figure S23 <sup>1</sup>H NMR spectra of compound 16

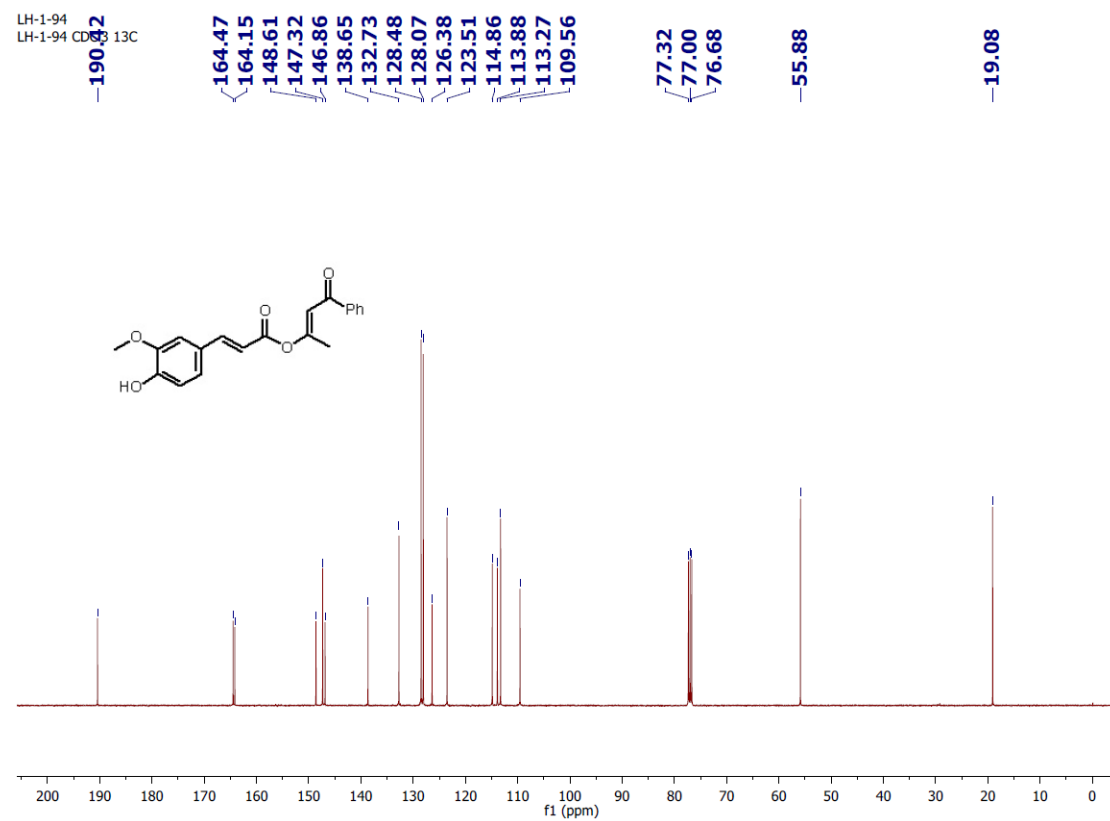

Figure S24 13C NMR spectra of compound 16

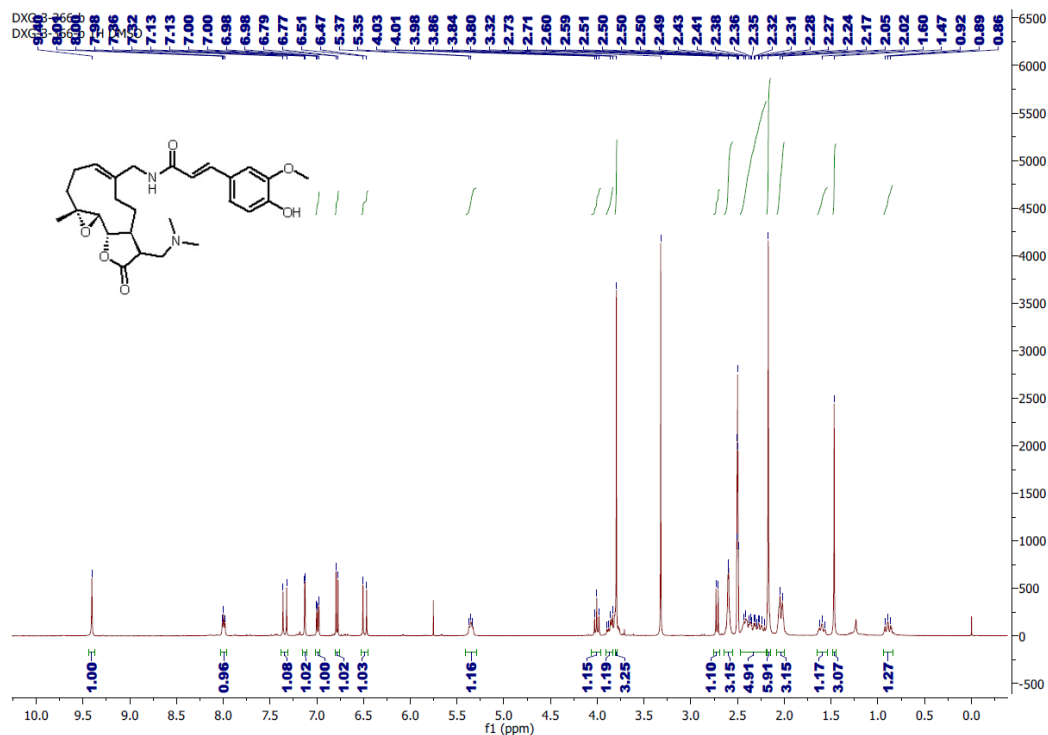

Figure S25 1H NMR spectra of compound 4

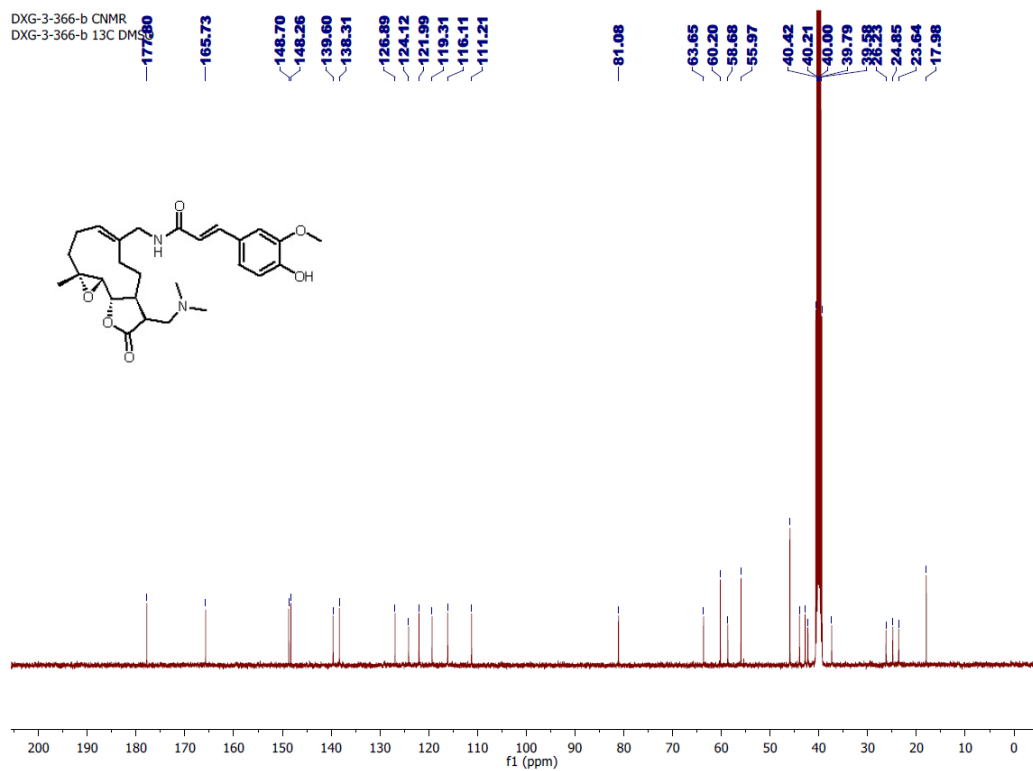

Figure S26 13C NMR spectra of compound 4

Table S1 Primers for qRT-PCR

|                          |                          |
|--------------------------|--------------------------|
| Forward: TNF- $\alpha$   | GAAGATCACCTCCGCTCCCAATG  |
| Reverse: TNF- $\alpha$   | ATGTTCCCGTCCACCACCTCTC   |
| Forward: mF-IL-6         | CTTCTTGGGACTGATGCTGGTGAC |
| Reverse: mR-IL-6         | AGGTCTGTTGGGAGTGGTATCCTC |
| Forward: mF-IL-1 $\beta$ | TCGCAGCAGCACATCAACAAGAG  |
| Reverse: mR-IL-1 $\beta$ | AGGTCCACGGGAAAGACACAGG   |
| Forward: mF18S           | CGCCGCTAGAGGTGAAATTCT    |
| Reverse: mR18S           | CGAACCTCCGACTTTCGTTCT    |
| Forward: iNOS            | AGGAGGAGAGAGATCCGATTTAG  |
| Reverse: iNOS            | TCAGACTTCCCTGTCTCAGTAG   |
